# Supplementary material for: Development of brain atlases for early-to-middle adolescent collision-sport athletes
Source: PubMed Central journal article supplement (PMC7979742; doi:10.1038/s41598-021-85518-6), 2021-03-19
Supplement: 41598_2021_85518_MOESM1_ESM.pdf [file 41598_2021_85518_MOESM1_ESM.pdf]

**Title:** Development of brain atlases for early-to-middle adolescent collision-sport athletes

**Full Author List:** Yukai Zou<sup>1,2</sup>, Wenbin Zhu<sup>3</sup>, Ho-Ching (Shawn) Yang<sup>1</sup>, Ikbeom Jang<sup>4</sup>, Nicole L. Vike<sup>5</sup>, Diana O. Svaldi<sup>1</sup>, Trey E. Shenk<sup>4</sup>, Victoria N. Poole<sup>1,5</sup>, Evan L. Breedlove<sup>6</sup>, Gregory G. Tamer, Jr.<sup>1</sup>, Larry J. Leverenz<sup>7</sup>; Ulrike Dydak<sup>8</sup>, Eric A. Nauman<sup>1,5,6</sup>, Yunjie Tong<sup>1</sup>, Thomas M. Talavage<sup>1,4</sup> and Joseph V. Rispoli<sup>1,4,\*</sup>

**Institutional Affiliations:**

<sup>1</sup>Weldon School of Biomedical Engineering, Purdue University, West Lafayette, IN, USA

<sup>2</sup>College of Veterinary Medicine, Purdue University, West Lafayette, IN, USA

<sup>3</sup>Department of Statistics, Purdue University, West Lafayette, IN, USA

<sup>4</sup>School of Electrical and Computer Engineering, Purdue University, West Lafayette, IN, USA

<sup>5</sup>Department of Basic Medical Sciences, Purdue University, West Lafayette, IN, USA

<sup>6</sup>School of Mechanical Engineering, Purdue University, West Lafayette, IN, USA

<sup>7</sup>Department of Health and Kinesiology, Purdue University, West Lafayette, IN, USA

<sup>8</sup>School of Health Sciences, Purdue University, West Lafayette, IN, USA

\* **Corresponding Author:** Joseph V. Rispoli, 206 S Martin Jischke Drive, West Lafayette, IN 47907-2032, U.S.A., Phone: +1 (765) 494-6178, Fax: +1 (765) 496-1459, E-mail: jrispoli@purdue.edu

## Supplementary Figures and Tables

**Supplementary Fig. S1** Voxel-wise  $t$ -statistical maps ( $p < 0.05$ , corrected) of potential bias, comparing PNG (ANTs) template to high-quality standardized DTI templates (FMRIB58 and IITv3.0), and to PNG (DTI-TK) template, represented in axial view in ICBM152 space. Red/blue indicates significantly larger/smaller changes of morphology during spatial normalization, compared to using PNG (ANTs) template.

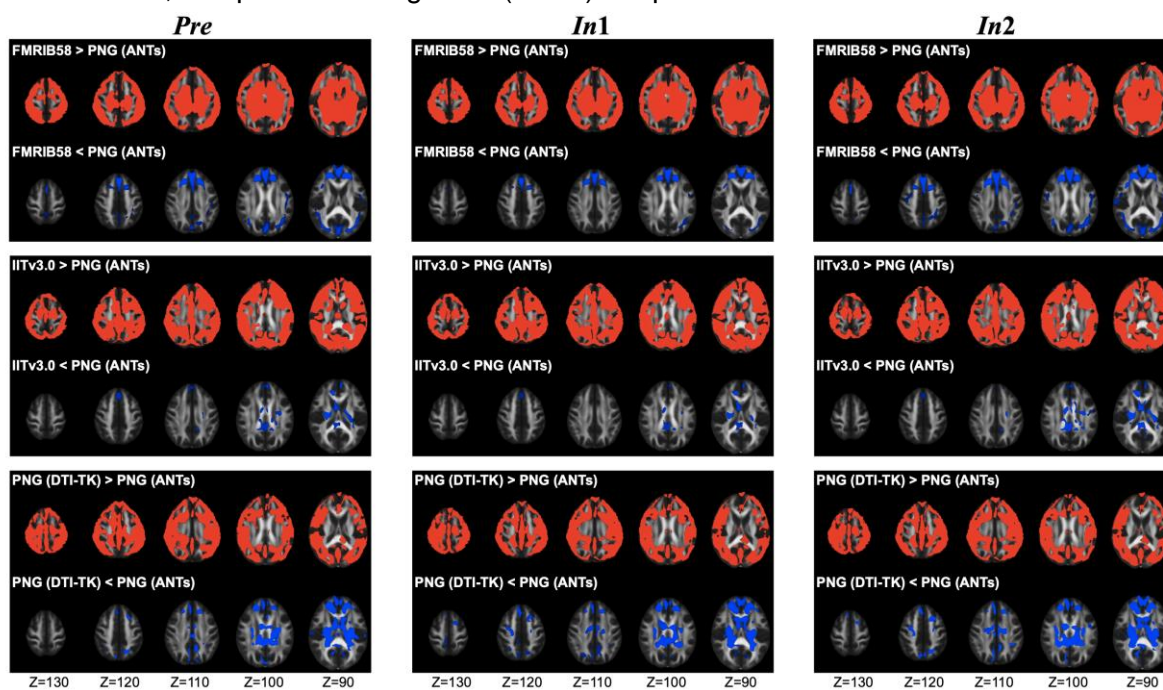

**Supplementary Fig. S2** Illustrations of  $t$ -statistical maps (blue-lightblue, FWE corrected,  $p < 0.05$ ) showing increased MD at *In2* vs. *Pre* in sagittal, coronal, and axial views, overlaid on TBSS skeleton (green) and mean FA image derived from FMRIB58, IITv3.0, PNG (ANTS), and PNG (DTI-TK) DTI templates respectively. *L/R*: left/right hemisphere. *A/P*: anterior/posterior. *S/I*: superior/inferior.

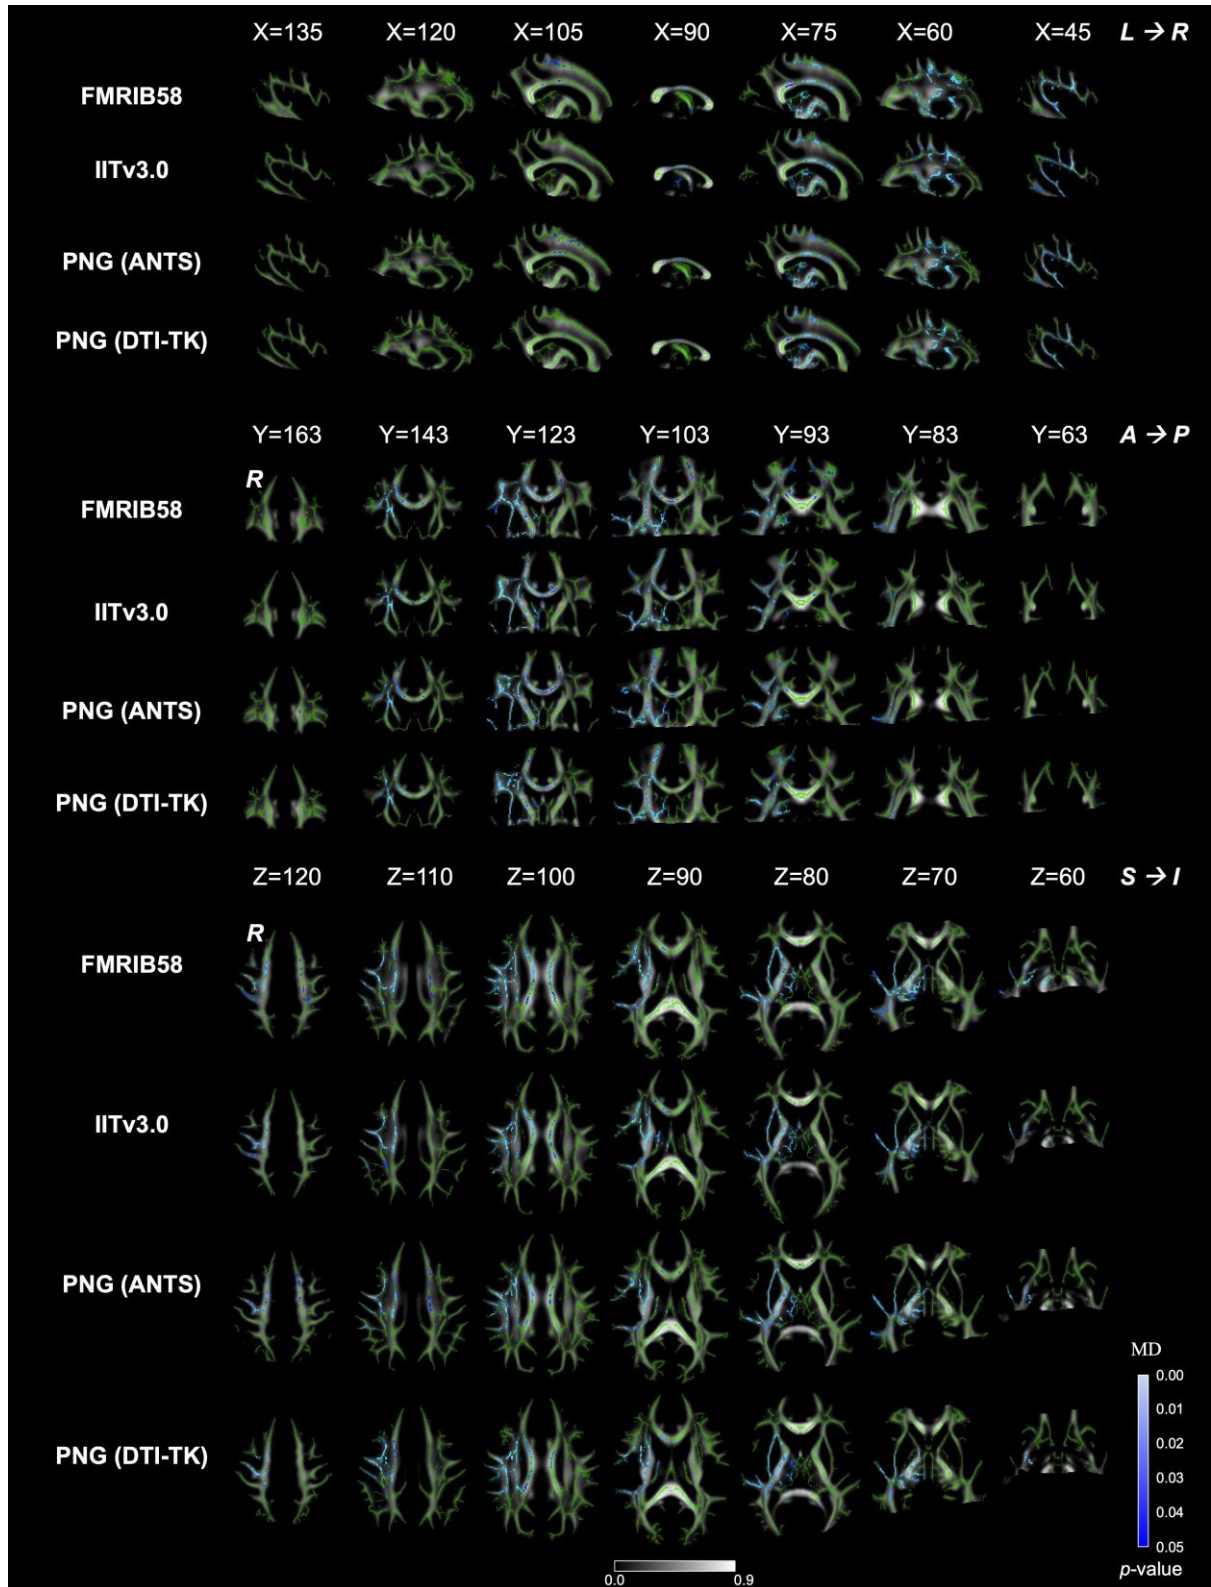

**Supplementary Fig. S3** Illustrations of  $t$ -statistical maps (red-yellow, FWE corrected,  $p < 0.05$ ) showing decreased AD at *In2* vs. *Pre* in sagittal, coronal, and axial views, overlaid on TBSS skeleton (green) and mean FA image derived from FMRIB58, IITv3.0, PNG (ANTS), and PNG (DTI-TK) DTI templates respectively. *L/R*: left/right hemisphere. *A/P*: anterior/posterior. *S/I*: superior/inferior.

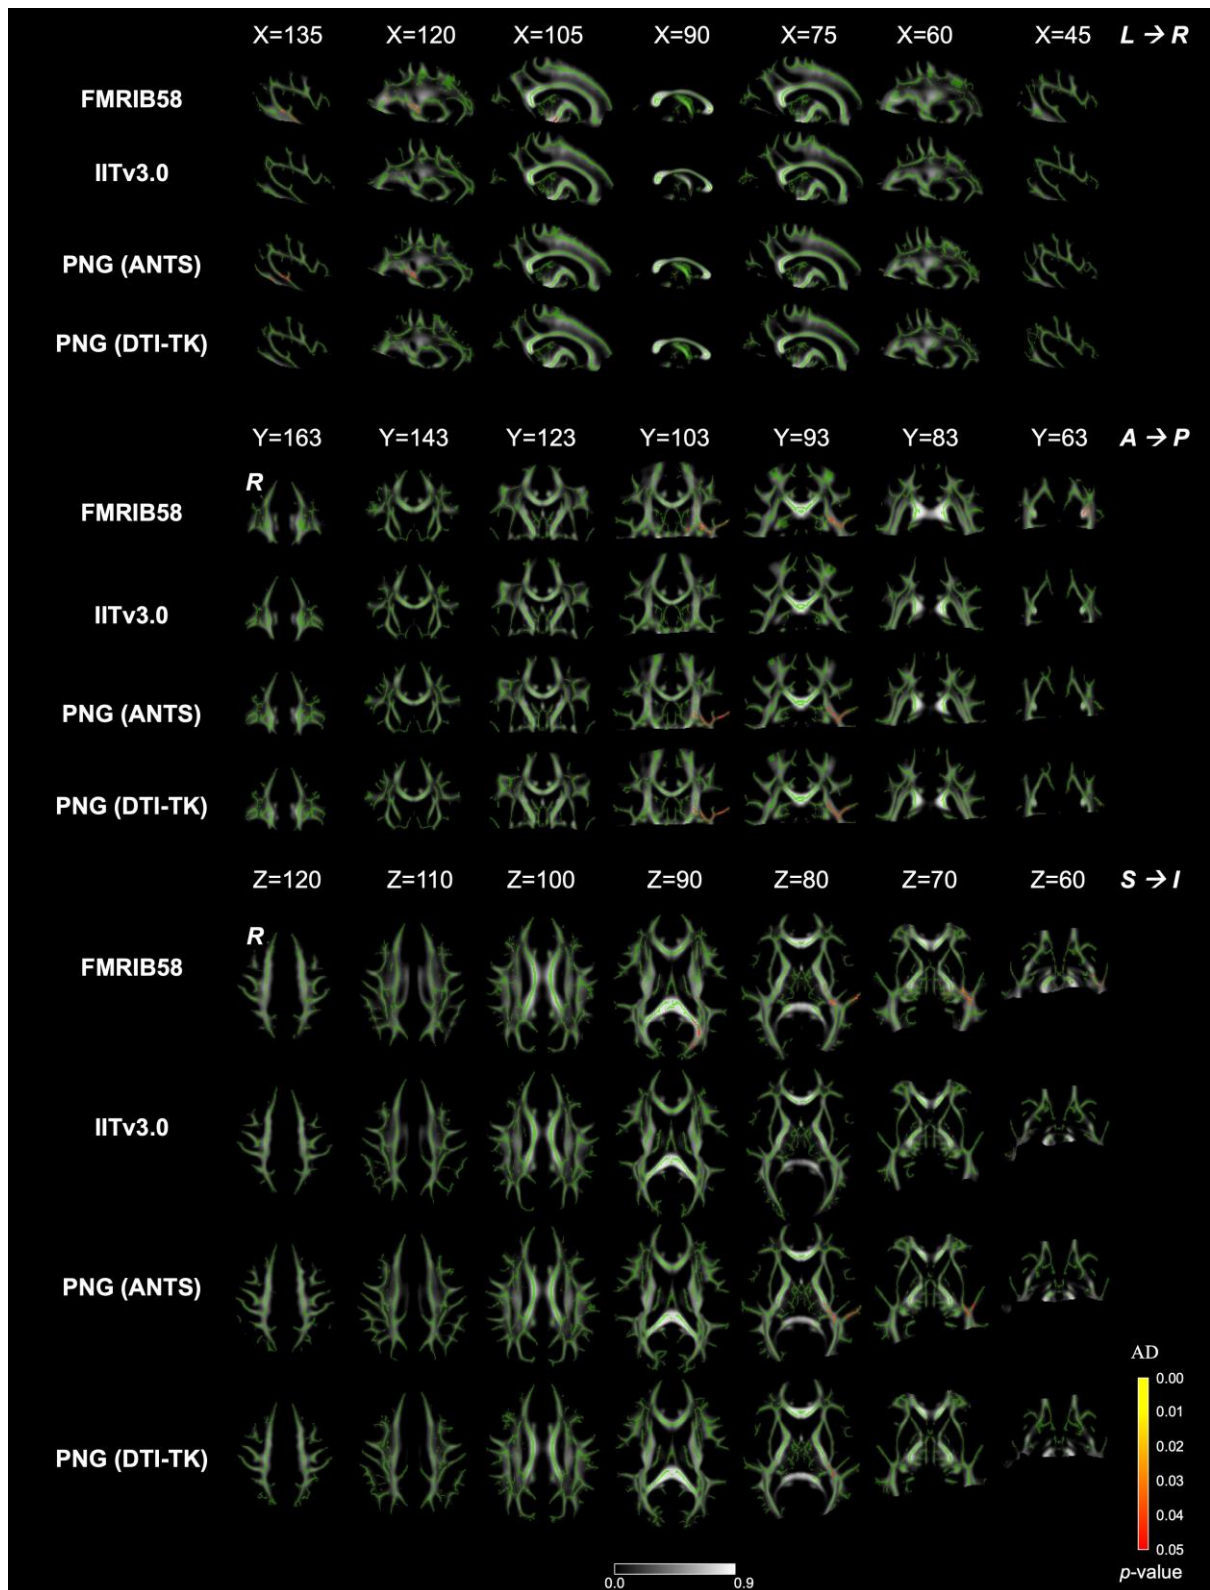



**Supplementary Fig. S4** Illustrations of  $t$ -statistical maps (blue-lightblue, FWE corrected,  $p < 0.05$ ) showing increased RD at *In2* vs. *Pre* in sagittal, coronal, and axial views, overlaid on TBSS skeleton (green) and mean FA image derived from FMRIB58, IITv3.0, PNG (ANTS), and PNG (DTI-TK) DTI templates respectively. *L/R*: left/right hemisphere. *A/P*: anterior/posterior. *S/I*: superior/inferior.

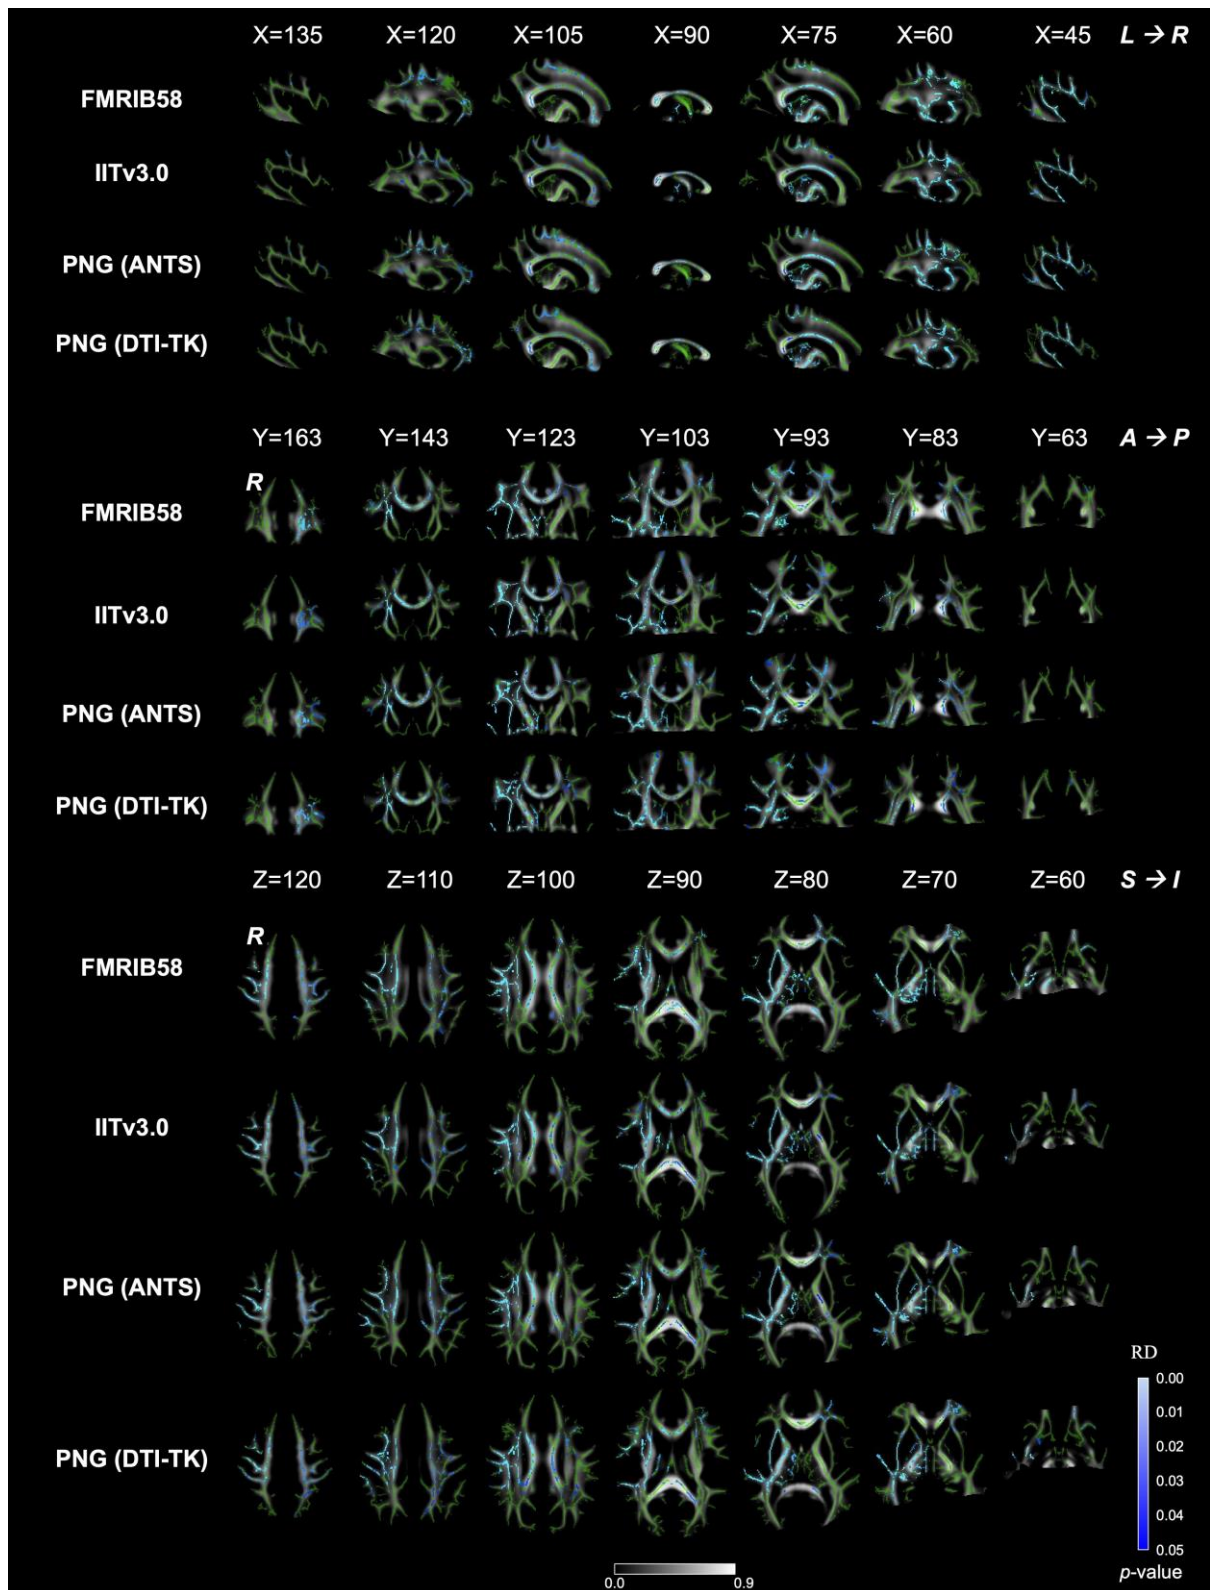

### Abbreviations in Supplementary Tables S1-S4:

|          |                                                   |
|----------|---------------------------------------------------|
| acr      | Corona radiata - anterior                         |
| alic     | Internal capsule - anterior                       |
| bcc      | Corpus callosum - body                            |
| cg       | Cingulum (cingulate gyrus)                        |
| cg(h)    | Cingulum (hippocampus)                            |
| cp       | Cerebral peduncle                                 |
| ec       | External capsule                                  |
| gcc      | Corpus callosum - genu                            |
| llf/lfof | Inferior longitudinal/fronto-occipital fasciculus |
| pcr      | Corona radiata - posterior                        |
| plic     | Internal capsule - posterior                      |
| ptr      | Posterior thalamic radiation                      |
| rlic     | Internal capsule - retrolenticular                |
| scc      | Corpus callosum - splenium                        |
| scr      | Corona radiata - superior                         |
| sfof     | Superior fronto-occipital fasciculus              |
| slf      | Superior longitudinal fasciculus                  |
| st       | Stria terminalis                                  |
| uf       | Uncinate fasciculus                               |

**Supplementary Table S1** Summary of the number of statistically significant voxels that exhibit lower FA at *In2* vs. *Pre* (numerator), with respect to the corresponding total number of voxels within each ROI (denominator), for the standardized and population-specific DTI templates. L/R: Left/right hemisphere.

| <b>ROI</b>   | <b>FMRIB58</b>     | <b>IITv3.0</b>     | <b>PNG (ANTs)</b>  | <b>PNG (DTI-TK)</b> |
|--------------|--------------------|--------------------|--------------------|---------------------|
| cp L         | 188/247            | 178/230            | 199/244            | 185/240             |
| cp R         | 230/283            | 189/249            | 229/271            | 205/253             |
| cg L         | 221/487            | 126/278            | 116/320            | 5/213               |
| cg R         | 32/422             | 106/252            | 108/251            | 6/111               |
| scr L        | 841/1234           | 892/1318           | 932/1370           | 946/1345            |
| scr R        | 1182/1323          | 1225/1369          | 1260/1387          | 1200/1363           |
| acr L        | 874/1546           | 868/1583           | 828/1583           | 836/1589            |
| acr R        | 499/1504           | 414/1628           | 374/1635           | 368/1633            |
| pcr L        | 425/741            | 381/695            | 319/683            | 285/687             |
| pcr R        | 324/818            | 292/820            | 278/859            | 257/819             |
| bcc          | 2057/3142          | 2180/3182          | 2256/3295          | 2188/3360           |
| gcc          | 907/1743           | 935/1823           | 933/1696           | 878/1786            |
| scc          | 1717/2528          | 1389/2278          | 1383/2397          | 1321/2397           |
| ec L         | 166/1353           | 123/1351           | 93/1287            | 102/1340            |
| ec R         | 858/1239           | 809/1240           | 850/1162           | 818/1244            |
| fornix       | 14/162             | 88/142             | 99/162             | 13/168              |
| cg(h) L      | 25/60              | 2/14               | 24/42              | 0/53                |
| cg(h) R      | 86/110             | 0/44               | 63/77              | 0/81                |
| ilf/lfof L   | 96/241             | 75/183             | 91/185             | 87/205              |
| ilf/lfof R   | 270/334            | 186/279            | 205/258            | 161/225             |
| alic L       | 381/776            | 355/703            | 337/729            | 345/735             |
| alic R       | 550/786            | 554/771            | 509/725            | 536/760             |
| plic L       | 576/859            | 641/853            | 650/857            | 703/862             |
| plic R       | 690/858            | 659/835            | 713/855            | 744/872             |
| rlic L       | 468/782            | 421/796            | 525/795            | 525/793             |
| rlic R       | 615/767            | 611/774            | 664/768            | 639/759             |
| ptr L        | 265/991            | 182/881            | 174/755            | 152/763             |
| ptr R        | 484/1101           | 192/969            | 309/912            | 155/872             |
| st L         | 221/316            | 133/174            | 185/249            | 177/239             |
| st R         | 274/288            | 129/132            | 221/227            | 216/223             |
| sfof L       | 28/93              | 57/114             | 52/117             | 52/112              |
| sfof R       | 62/98              | 83/112             | 88/113             | 95/112              |
| slf L        | 478/1332           | 714/1694           | 640/1662           | 716/1769            |
| slf R        | 765/1402           | 833/1640           | 1030/1702          | 892/1760            |
| tapetum L    | 0/2                | 10/15              | 20/29              | 30/54               |
| tapetum R    | 5/20               | 3/22               | 15/54              | 19/78               |
| uf L         | 0/16               | 0/28               | 0/10               | 0/6                 |
| uf R         | 11/13              | 5/10               | 13/17              | 7/7                 |
| <b>Total</b> | <b>16885/30017</b> | <b>16040/29481</b> | <b>16785/29740</b> | <b>15864/29888</b>  |

**Supplementary Table S2** Summary of the number of statistically significant voxels that exhibit higher MD at *In2* vs. *Pre* (numerator), with respect to the corresponding total number of voxels within each ROI (denominator), for the standardized and population-specific DTI templates. L/R: Left/right hemisphere.

| ROI          | FMRIB58           | IITv3.0           | PNG (ANTs)        | PNG (DTI-TK)      |
|--------------|-------------------|-------------------|-------------------|-------------------|
| cp L         | 0/247             | 0/230             | 0/244             | 0/240             |
| cp R         | 185/283           | 135/249           | 168/271           | 143/253           |
| cg L         | 0/487             | 22/278            | 0/320             | 0/213             |
| cg R         | 216/422           | 99/252            | 0/251             | 0/111             |
| scr L        | 137/1234          | 5/1318            | 107/1370          | 5/1345            |
| scr R        | 1014/1323         | 1089/1369         | 1072/1387         | 1098/1363         |
| acr L        | 0/1546            | 0/1583            | 7/1583            | 0/1589            |
| acr R        | 309/1504          | 322/1628          | 294/1635          | 290/1633          |
| pcr L        | 8/741             | 0/695             | 0/683             | 0/687             |
| pcr R        | 204/818           | 170/820           | 168/859           | 186/819           |
| bcc          | 1225/3142         | 1104/3182         | 955/3295          | 1025/3360         |
| gcc          | 312/1743          | 154/1823          | 324/1696          | 186/1786          |
| scc          | 73/2528           | 22/2278           | 53/2397           | 52/2397           |
| ec L         | 0/1353            | 0/1351            | 0/1287            | 0/1340            |
| ec R         | 843/1239          | 842/1240          | 821/1162          | 805/1244          |
| fornix       | 0/162             | 44/142            | 2/162             | 0/168             |
| cg(h) L      | 0/60              | 0/14              | 0/42              | 0/53              |
| cg(h) R      | 0/110             | 0/44              | 0/77              | 0/81              |
| ilf/lfof L   | 0/241             | 0/183             | 0/185             | 0/205             |
| ilf/lfof R   | 229/334           | 169/279           | 178/258           | 152/225           |
| alic L       | 0/776             | 0/703             | 0/729             | 0/735             |
| alic R       | 518/786           | 465/771           | 460/725           | 473/760           |
| plic L       | 0/859             | 0/853             | 0/857             | 0/862             |
| plic R       | 703/858           | 669/835           | 680/855           | 725/872           |
| rlic L       | 0/782             | 0/796             | 0/795             | 0/793             |
| rlic R       | 409/767           | 385/774           | 376/768           | 362/759           |
| ptr L        | 0/991             | 0/881             | 0/755             | 0/763             |
| ptr R        | 123/1101          | 103/969           | 93/912            | 99/872            |
| st L         | 0/316             | 0/174             | 0/249             | 0/239             |
| st R         | 180/288           | 63/132            | 136/227           | 130/223           |
| sfof L       | 0/93              | 0/114             | 0/117             | 0/112             |
| sfof R       | 78/98             | 99/112            | 93/113            | 76/112            |
| slf L        | 0/1332            | 0/1694            | 0/1662            | 0/1769            |
| slf R        | 762/1402          | 821/1640          | 834/1702          | 861/1760          |
| tapetum L    | 0/2               | 0/15              | 0/29              | 0/54              |
| tapetum R    | 3/20              | 0/22              | 0/54              | 0/78              |
| uf L         | 0/16              | 0/28              | 0/10              | 0/6               |
| uf R         | 13/13             | 9/10              | 17/17             | 7/7               |
| <b>Total</b> | <b>7544/30017</b> | <b>6791/29481</b> | <b>6838/29740</b> | <b>6675/29888</b> |



**Supplementary Table S3** Summary of the number of statistically significant voxels that exhibit lower AD at *In2* vs. *Pre* (numerator), with respect to the corresponding total number of voxels within each ROI (denominator), for the standardized and population-specific DTI templates. L/R: Left/right hemisphere.

| ROI          | FMRIB58          | IITv3.0        | PNG (ANTs)       | PNG (DTI-TK)     |
|--------------|------------------|----------------|------------------|------------------|
| cp L         | 109/247          | 0/230          | 0/244            | 0/240            |
| cp R         | 0/283            | 0/249          | 0/271            | 0/253            |
| cg L         | 0/487            | 0/278          | 0/320            | 0/213            |
| cg R         | 0/422            | 0/252          | 0/251            | 0/111            |
| scr L        | 0/1234           | 0/1318         | 0/1370           | 0/1345           |
| scr R        | 0/1323           | 0/1369         | 0/1387           | 0/1363           |
| acr L        | 0/1546           | 0/1583         | 0/1583           | 0/1589           |
| acr R        | 0/1504           | 0/1628         | 0/1635           | 0/1633           |
| pcr L        | 35/741           | 0/695          | 0/683            | 0/687            |
| pcr R        | 0/818            | 0/820          | 0/859            | 0/819            |
| bcc          | 0/3142           | 0/3182         | 0/3295           | 0/3360           |
| gcc          | 0/1743           | 0/1823         | 0/1696           | 0/1786           |
| scc          | 67/2528          | 0/2278         | 0/2397           | 0/2397           |
| ec L         | 63/1353          | 0/1351         | 40/1287          | 0/1340           |
| ec R         | 0/1239           | 0/1240         | 0/1162           | 0/1244           |
| fornix       | 0/162            | 0/142          | 0/162            | 0/168            |
| cg(h) L      | 0/60             | 0/14           | 0/42             | 0/53             |
| cg(h) R      | 0/110            | 0/44           | 0/77             | 0/81             |
| ilf/lfof L   | 57/241           | 0/183          | 75/185           | 0/205            |
| ilf/lfof R   | 0/334            | 0/279          | 0/258            | 0/225            |
| alic L       | 0/776            | 0/703          | 0/729            | 0/735            |
| alic R       | 0/786            | 0/771          | 0/725            | 0/760            |
| plic L       | 48/859           | 0/853          | 23/857           | 0/862            |
| plic R       | 0/858            | 0/835          | 0/855            | 0/872            |
| rlic L       | 389/782          | 0/796          | 402/795          | 95/793           |
| rlic R       | 0/767            | 0/774          | 0/768            | 0/759            |
| ptr L        | 100/991          | 0/881          | 26/755           | 5/763            |
| ptr R        | 0/1101           | 0/969          | 0/912            | 0/872            |
| st L         | 16/316           | 0/174          | 5/249            | 0/239            |
| st R         | 0/288            | 0/132          | 0/227            | 0/223            |
| sfof L       | 0/93             | 0/114          | 0/117            | 0/112            |
| sfof R       | 0/98             | 0/112          | 0/113            | 0/112            |
| slf L        | 0/1332           | 0/1694         | 0/1662           | 0/1769           |
| slf R        | 0/1402           | 0/1640         | 0/1702           | 0/1760           |
| tapetum L    | 0/2              | 0/15           | 0/29             | 0/54             |
| tapetum R    | 0/20             | 0/22           | 0/54             | 0/78             |
| uf L         | 4/16             | 0/28           | 0/10             | 0/6              |
| uf R         | 0/13             | 0/10           | 0/17             | 0/7              |
| <b>Total</b> | <b>888/30017</b> | <b>0/29481</b> | <b>571/29740</b> | <b>100/29888</b> |

**Supplementary Table S4** Summary of the number of statistically significant voxels that exhibit higher RD at *In2* vs. *Pre* (numerator), with respect to the corresponding total number of voxels within each ROI (denominator), for the standardized and population-specific DTI templates. L/R: Left/right hemisphere.

| <b>ROI</b>   | <b>FMRIB58</b>     | <b>IITv3.0</b>     | <b>PNG (ANTs)</b>  | <b>PNG (DTI-TK)</b> |
|--------------|--------------------|--------------------|--------------------|---------------------|
| cp L         | 0/247              | 0/230              | 0/244              | 0/240               |
| cp R         | 237/283            | 185/249            | 223/271            | 192/253             |
| cg L         | 229/487            | 121/278            | 139/320            | 52/213              |
| cg R         | 227/422            | 112/252            | 125/251            | 4/111               |
| scr L        | 569/1546           | 513/1583           | 445/1583           | 597/1589            |
| scr R        | 419/1504           | 391/1628           | 404/1635           | 407/1633            |
| acr L        | 122/741            | 105/695            | 127/683            | 111/687             |
| acr R        | 236/818            | 260/820            | 256/859            | 244/819             |
| pcr L        | 373/1234           | 457/1318           | 302/1370           | 511/1345            |
| pcr R        | 1206/1323          | 1285/1369          | 1296/1387          | 1249/1363           |
| bcc          | 1792/3142          | 1804/3182          | 1873/3295          | 1901/3360           |
| gcc          | 690/1743           | 702/1823           | 677/1696           | 689/1786            |
| scc          | 1227/2528          | 1024/2278          | 1099/2397          | 1017/2397           |
| ec L         | 39/1353            | 34/1351            | 0/1287             | 22/1340             |
| ec R         | 933/1239           | 943/1240           | 929/1162           | 959/1244            |
| fornix       | 19/162             | 75/142             | 7/162              | 0/168               |
| cg(h) L      | 0/60               | 0/14               | 0/42               | 0/53                |
| cg(h) R      | 0/110              | 0/44               | 0/77               | 0/81                |
| ilf/lfof L   | 0/241              | 0/183              | 0/185              | 0/205               |
| ilf/lfof R   | 282/334            | 204/279            | 205/258            | 175/225             |
| alic L       | 0/776              | 0/703              | 0/729              | 0/735               |
| alic R       | 583/786            | 563/771            | 532/725            | 539/760             |
| plic L       | 0/859              | 80/853             | 111/857            | 0/862               |
| plic R       | 719/858            | 707/835            | 727/855            | 773/872             |
| rlic L       | 67/782             | 0/796              | 124/795            | 2/793               |
| rlic R       | 584/767            | 571/774            | 622/768            | 600/759             |
| ptr L        | 112/991            | 53/881             | 64/755             | 3/763               |
| ptr R        | 197/1101           | 220/969            | 157/912            | 214/872             |
| st L         | 0/316              | 0/174              | 0/249              | 0/239               |
| st R         | 260/288            | 118/132            | 209/227            | 199/223             |
| sfof L       | 0/93               | 0/114              | 0/117              | 0/112               |
| sfof R       | 87/98              | 107/112            | 105/113            | 99/112              |
| slf L        | 169/1332           | 69/1694            | 250/1662           | 295/1769            |
| slf R        | 840/1402           | 877/1640           | 1046/1702          | 1001/1760           |
| tapetum L    | 0/2                | 5/15               | 9/29               | 11/54               |
| tapetum R    | 4/20               | 3/22               | 13/54              | 16/78               |
| uf L         | 0/16               | 0/28               | 0/10               | 0/6                 |
| uf R         | 13/13              | 10/10              | 17/17              | 7/7                 |
| <b>Total</b> | <b>12235/30017</b> | <b>11598/29481</b> | <b>12093/29740</b> | <b>11889/29888</b>  |

**Supplementary Table S5** Summary of linear mixed-effect regression analyses of the longitudinal FA changes during a single season. L/R: Left/right hemisphere.

| ROI                          | Template     | AIC      | Timepoint |          | FA (mean $\pm$ SE)               |
|------------------------------|--------------|----------|-----------|----------|----------------------------------|
|                              |              |          | <i>t</i>  | <i>p</i> |                                  |
| Cerebral peduncle L          | FMRIB58      | -999.01  | -3.933    | <0.001   | 0.77 $\pm$ 2.64 $\times 10^{-3}$ |
| Cerebral peduncle L          | IITv3.0      | -965.84  | -4.022    | <0.001   | 0.76 $\pm$ 2.86 $\times 10^{-3}$ |
| Cerebral peduncle L          | PNG (ANTs)   | -973.71  | -3.951    | <0.001   | 0.77 $\pm$ 2.89 $\times 10^{-3}$ |
| Cerebral peduncle L          | PNG (DTI-TK) | -957.59  | -3.832    | <0.001   | 0.77 $\pm$ 2.95 $\times 10^{-3}$ |
| Cingulum R                   | FMRIB58      | -700.25  | -2.424    | 0.017    | 0.52 $\pm$ 6.56 $\times 10^{-3}$ |
| Cingulum R                   | IITv3.0      | -842.96  | -3.613    | <0.001   | 0.60 $\pm$ 4.14 $\times 10^{-3}$ |
| Cingulum R                   | PNG (ANTs)   | -807.77  | -3.089    | 0.002    | 0.58 $\pm$ 4.80 $\times 10^{-3}$ |
| Cingulum R                   | PNG (DTI-TK) | -503.29  | -1.590    | 0.114    | 0.51 $\pm$ 9.82 $\times 10^{-3}$ |
| Corona radiata - anterior L  | FMRIB58      | -949.87  | -5.608    | <0.001   | 0.54 $\pm$ 4.32 $\times 10^{-3}$ |
| Corona radiata - anterior L  | IITv3.0      | -965.64  | -5.730    | <0.001   | 0.52 $\pm$ 4.10 $\times 10^{-3}$ |
| Corona radiata - anterior L  | PNG (ANTs)   | -950.56  | -5.427    | <0.001   | 0.51 $\pm$ 4.30 $\times 10^{-3}$ |
| Corona radiata - anterior L  | PNG (DTI-TK) | -938.73  | -5.380    | <0.001   | 0.53 $\pm$ 4.20 $\times 10^{-3}$ |
| Corona radiata - anterior R  | FMRIB58      | -909.23  | -4.273    | <0.001   | 0.51 $\pm$ 4.38 $\times 10^{-3}$ |
| Corona radiata - anterior R  | IITv3.0      | -910.47  | -4.359    | <0.001   | 0.49 $\pm$ 4.14 $\times 10^{-3}$ |
| Corona radiata - anterior R  | PNG (ANTs)   | -885.24  | -3.761    | <0.001   | 0.48 $\pm$ 4.23 $\times 10^{-3}$ |
| Corona radiata - anterior R  | PNG (DTI-TK) | -915.48  | -3.729    | <0.001   | 0.47 $\pm$ 3.81 $\times 10^{-3}$ |
| Corona radiata - posterior L | FMRIB58      | -984.76  | -3.561    | 0.001    | 0.52 $\pm$ 3.44 $\times 10^{-3}$ |
| Corona radiata - posterior L | IITv3.0      | -936.43  | -3.208    | 0.002    | 0.53 $\pm$ 3.87 $\times 10^{-3}$ |
| Corona radiata - posterior L | PNG (ANTs)   | -949.14  | -2.919    | 0.004    | 0.53 $\pm$ 3.70 $\times 10^{-3}$ |
| Corona radiata - posterior L | PNG (DTI-TK) | -948.28  | -3.060    | 0.003    | 0.53 $\pm$ 3.93 $\times 10^{-3}$ |
| Corona radiata - superior L  | FMRIB58      | -1001.89 | -3.744    | <0.001   | 0.53 $\pm$ 3.35 $\times 10^{-3}$ |
| Corona radiata - superior L  | IITv3.0      | -1006.36 | -3.888    | <0.001   | 0.52 $\pm$ 3.26 $\times 10^{-3}$ |
| Corona radiata - superior L  | PNG (ANTs)   | -1015.91 | -4.134    | <0.001   | 0.52 $\pm$ 3.24 $\times 10^{-3}$ |
| Corona radiata - superior L  | PNG (DTI-TK) | -1016.41 | -4.144    | <0.001   | 0.52 $\pm$ 3.21 $\times 10^{-3}$ |
| Corona radiata - superior R  | FMRIB58      | -976.17  | -4.211    | <0.001   | 5.23 $\pm$ 3.39 $\times 10^{-3}$ |
| Corona radiata - superior R  | IITv3.0      | -974.19  | -4.117    | <0.001   | 5.24 $\pm$ 3.29 $\times 10^{-3}$ |
| Corona radiata - superior R  | PNG (ANTs)   | -976.06  | -4.314    | <0.001   | 5.22 $\pm$ 3.33 $\times 10^{-3}$ |
| Corona radiata - superior R  | PNG (DTI-TK) | -966.94  | -4.117    | <0.001   | 5.17 $\pm$ 3.25 $\times 10^{-3}$ |
| External capsule R           | FMRIB58      | -978.78  | -3.761    | <0.001   | 0.46 $\pm$ 2.66 $\times 10^{-3}$ |
| External capsule R           | IITv3.0      | -966.54  | -3.966    | <0.001   | 0.45 $\pm$ 2.71 $\times 10^{-3}$ |
| External capsule R           | PNG (ANTs)   | -973.99  | -3.771    | <0.001   | 0.44 $\pm$ 2.68 $\times 10^{-3}$ |
| External capsule R           | PNG (DTI-TK) | -959.33  | -3.905    | <0.001   | 0.45 $\pm$ 2.79 $\times 10^{-3}$ |

(cont.)

| ROI                                    | Template     | AIC      | Timepoint |        | FA (mean $\pm$ SE)               |
|----------------------------------------|--------------|----------|-----------|--------|----------------------------------|
|                                        |              |          | t         | p      |                                  |
| Internal capsule - anterior L          | FMRIB58      | -997.92  | -4.395    | <0.001 | 0.64 $\pm$ 2.69 $\times 10^{-3}$ |
| Internal capsule - anterior L          | IITv3.0      | -983.46  | -4.613    | <0.001 | 0.64 $\pm$ 2.94 $\times 10^{-3}$ |
| Internal capsule - anterior L          | PNG (ANTs)   | -969.37  | -4.228    | <0.001 | 0.64 $\pm$ 2.89 $\times 10^{-3}$ |
| Internal capsule - anterior L          | PNG (DTI-TK) | -975.60  | -4.363    | <0.001 | 0.64 $\pm$ 2.87 $\times 10^{-3}$ |
| Internal capsule - anterior R          | FMRIB58      | -893.71  | -3.600    | <0.001 | 0.64 $\pm$ 3.21 $\times 10^{-3}$ |
| Internal capsule - anterior R          | IITv3.0      | -897.37  | -4.006    | <0.001 | 0.63 $\pm$ 3.10 $\times 10^{-3}$ |
| Internal capsule - anterior R          | PNG (ANTs)   | -890.68  | -3.790    | <0.001 | 0.64 $\pm$ 3.25 $\times 10^{-3}$ |
| Internal capsule - anterior R          | PNG (DTI-TK) | -888.37  | -3.921    | <0.001 | 0.63 $\pm$ 3.24 $\times 10^{-3}$ |
| Internal capsule - posterior R         | FMRIB58      | -963.365 | -3.631    | <0.001 | 0.73 $\pm$ 3.11 $\times 10^{-3}$ |
| Internal capsule - posterior R         | IITv3.0      | -940.976 | -3.519    | 0.001  | 0.74 $\pm$ 3.29 $\times 10^{-3}$ |
| Internal capsule - posterior R         | PNG (ANTs)   | -936.896 | -3.512    | 0.001  | 0.75 $\pm$ 3.40 $\times 10^{-3}$ |
| Internal capsule - posterior R         | PNG (DTI-TK) | -934.373 | -3.565    | 0.001  | 0.75 $\pm$ 3.39 $\times 10^{-3}$ |
| Ilf/lfof L                             | FMRIB58      | -803.62  | -3.122    | 0.002  | 0.53 $\pm$ 4.86 $\times 10^{-3}$ |
| Ilf/lfof L                             | IITv3.0      | -756.94  | -2.823    | 0.006  | 0.52 $\pm$ 5.31 $\times 10^{-3}$ |
| Ilf/lfof L                             | PNG (ANTs)   | -782.88  | -2.949    | 0.004  | 0.52 $\pm$ 5.07 $\times 10^{-3}$ |
| Ilf/lfof L                             | PNG (DTI-TK) | -773.21  | -2.870    | 0.005  | 0.52 $\pm$ 5.20 $\times 10^{-3}$ |
| Stria terminalis L                     | FMRIB58      | -762.92  | -2.749    | 0.007  | 0.59 $\pm$ 4.19 $\times 10^{-3}$ |
| Stria terminalis L                     | IITv3.0      | -779.92  | -3.256    | 0.001  | 0.60 $\pm$ 4.20 $\times 10^{-3}$ |
| Stria terminalis L                     | PNG (ANTs)   | -770.46  | -2.895    | 0.004  | 0.59 $\pm$ 4.16 $\times 10^{-3}$ |
| Stria terminalis L                     | PNG (DTI-TK) | -758.32  | -2.880    | 0.005  | 0.59 $\pm$ 4.27 $\times 10^{-3}$ |
| Superior fronto-occipital fasciculus R | FMRIB58      | -815.55  | -2.341    | 0.021  | 0.50 $\pm$ 4.38 $\times 10^{-3}$ |
| Superior fronto-occipital fasciculus R | IITv3.0      | -828.50  | -2.756    | 0.007  | 0.53 $\pm$ 4.14 $\times 10^{-3}$ |
| Superior fronto-occipital fasciculus R | PNG (ANTs)   | -857.78  | -2.601    | 0.010  | 0.53 $\pm$ 3.85 $\times 10^{-3}$ |
| Superior fronto-occipital fasciculus R | PNG (DTI-TK) | -800.03  | -2.527    | 0.013  | 0.51 $\pm$ 4.60 $\times 10^{-3}$ |
| Superior fronto-occipital fasciculus L | FMRIB58      | -867.90  | -2.153    | 0.033  | 0.52 $\pm$ 4.15 $\times 10^{-3}$ |
| Superior fronto-occipital fasciculus L | IITv3.0      | -875.89  | -2.657    | 0.009  | 0.57 $\pm$ 3.56 $\times 10^{-3}$ |
| Superior fronto-occipital fasciculus L | PNG (ANTs)   | -900.60  | -2.504    | 0.014  | 0.58 $\pm$ 3.71 $\times 10^{-3}$ |
| Superior fronto-occipital fasciculus L | PNG (DTI-TK) | -854.08  | -2.480    | 0.014  | 0.56 $\pm$ 3.91 $\times 10^{-3}$ |
| Superior longitudinal fasciculus L     | FMRIB58      | -971.10  | -3.546    | 0.001  | 0.53 $\pm$ 3.68 $\times 10^{-3}$ |
| Superior longitudinal fasciculus L     | IITv3.0      | -996.79  | -4.505    | <0.001 | 0.51 $\pm$ 3.63 $\times 10^{-3}$ |
| Superior longitudinal fasciculus L     | PNG (ANTs)   | -980.14  | -4.146    | <0.001 | 0.51 $\pm$ 3.67 $\times 10^{-3}$ |
| Superior longitudinal fasciculus L     | PNG (DTI-TK) | -1004.10 | -4.592    | <0.001 | 0.50 $\pm$ 3.62 $\times 10^{-3}$ |
| Superior longitudinal fasciculus R     | FMRIB58      | -902.52  | -3.357    | 0.001  | 0.53 $\pm$ 3.76 $\times 10^{-3}$ |
| Superior longitudinal fasciculus R     | IITv3.0      | -882.84  | -3.333    | 0.001  | 0.51 $\pm$ 3.78 $\times 10^{-3}$ |
| Superior longitudinal fasciculus R     | PNG (ANTs)   | -904.06  | -3.397    | 0.001  | 0.51 $\pm$ 3.59 $\times 10^{-3}$ |
| Superior longitudinal fasciculus R     | PNG (DTI-TK) | -892.06  | -3.408    | 0.001  | 0.50 $\pm$ 3.60 $\times 10^{-3}$ |

**Supplementary Table S6** Summary of linear mixed-effect regression analyses of the longitudinal MD changes during a single season. L/R: Left/right hemisphere.

| ROI                                  | Template     | AIC      | Timepoint |        | MD (mean $\pm$ SE)                            |
|--------------------------------------|--------------|----------|-----------|--------|-----------------------------------------------|
|                                      |              |          | t         | p      |                                               |
| Corona radiata - superior L          | FMRIB58      | -3540.24 | 2.901     | 0.004  | $0.76 \times 10^{-3} \pm 3.75 \times 10^{-6}$ |
| Corona radiata - superior L          | IITv3.0      | -3397.20 | 1.620     | 0.108  | $0.76 \times 10^{-3} \pm 5.13 \times 10^{-6}$ |
| Corona radiata - superior L          | PNG (ANTs)   | -3531.50 | 2.907     | 0.004  | $0.74 \times 10^{-3} \pm 3.62 \times 10^{-6}$ |
| Corona radiata - superior L          | PNG (DTI-TK) | -3379.13 | 1.812     | 0.072  | $0.75 \times 10^{-3} \pm 5.19 \times 10^{-6}$ |
| Corona radiata - posterior R         | FMRIB58      | -3519.73 | 3.933     | <0.001 | $0.76 \times 10^{-3} \pm 4.17 \times 10^{-6}$ |
| Corona radiata - posterior R         | IITv3.0      | -3513.54 | 4.119     | <0.001 | $0.76 \times 10^{-3} \pm 4.18 \times 10^{-6}$ |
| Corona radiata - posterior R         | PNG (ANTs)   | -3516.49 | 3.991     | <0.001 | $0.76 \times 10^{-3} \pm 4.21 \times 10^{-6}$ |
| Corona radiata - posterior R         | PNG (DTI-TK) | -3526.66 | 4.227     | <0.001 | $0.77 \times 10^{-3} \pm 4.17 \times 10^{-6}$ |
| External capsule R                   | FMRIB58      | -3442.10 | 3.672     | <0.001 | $0.79 \times 10^{-3} \pm 3.77 \times 10^{-6}$ |
| External capsule R                   | IITv3.0      | -3432.47 | 3.605     | <0.001 | $0.79 \times 10^{-3} \pm 3.84 \times 10^{-6}$ |
| External capsule R                   | PNG (ANTs)   | -3434.88 | 3.625     | <0.001 | $0.79 \times 10^{-3} \pm 3.77 \times 10^{-6}$ |
| External capsule R                   | PNG (DTI-TK) | -3427.17 | 3.626     | <0.001 | $0.79 \times 10^{-3} \pm 3.85 \times 10^{-6}$ |
| Internal capsule - anterior R        | FMRIB58      | -3486.41 | 4.128     | <0.001 | $0.74 \times 10^{-3} \pm 3.30 \times 10^{-6}$ |
| Internal capsule - anterior R        | IITv3.0      | -3490.87 | 4.339     | <0.001 | $0.73 \times 10^{-3} \pm 3.28 \times 10^{-6}$ |
| Internal capsule - anterior R        | PNG (ANTs)   | -3489.21 | 4.291     | <0.001 | $0.74 \times 10^{-3} \pm 3.30 \times 10^{-6}$ |
| Internal capsule - anterior R        | PNG (DTI-TK) | -3481.10 | 4.353     | <0.001 | $0.73 \times 10^{-3} \pm 3.36 \times 10^{-6}$ |
| Internal capsule - retrolenticular R | FMRIB58      | -3496.76 | 3.524     | 0.001  | $0.78 \times 10^{-3} \pm 3.67 \times 10^{-6}$ |
| Internal capsule - retrolenticular R | IITv3.0      | -3483.14 | 3.648     | <0.001 | $0.78 \times 10^{-3} \pm 3.74 \times 10^{-6}$ |
| Internal capsule - retrolenticular R | PNG (ANTs)   | -3497.66 | 3.622     | <0.001 | $0.79 \times 10^{-3} \pm 3.56 \times 10^{-6}$ |
| Internal capsule - retrolenticular R | PNG (DTI-TK) | -3491.50 | 3.481     | 0.001  | $0.79 \times 10^{-3} \pm 3.58 \times 10^{-6}$ |
| Posterior thalamic radiation R       | FMRIB58      | -3292.57 | 3.475     | 0.001  | $0.78 \times 10^{-3} \pm 7.56 \times 10^{-6}$ |
| Posterior thalamic radiation R       | IITv3.0      | -3286.59 | 3.504     | 0.001  | $0.78 \times 10^{-3} \pm 7.47 \times 10^{-6}$ |
| Posterior thalamic radiation R       | PNG (ANTs)   | -3289.02 | 3.581     | <0.001 | $0.79 \times 10^{-3} \pm 7.29 \times 10^{-6}$ |
| Posterior thalamic radiation R       | PNG (DTI-TK) | -3289.95 | 3.432     | 0.001  | $0.79 \times 10^{-3} \pm 7.08 \times 10^{-6}$ |
| Stria terminalis R                   | FMRIB58      | -3400.11 | 3.900     | <0.001 | $0.79 \times 10^{-3} \pm 4.21 \times 10^{-6}$ |
| Stria terminalis R                   | IITv3.0      | -3360.82 | 4.016     | <0.001 | $0.81 \times 10^{-3} \pm 4.70 \times 10^{-6}$ |
| Stria terminalis R                   | PNG (ANTs)   | -3391.48 | 4.221     | <0.001 | $0.80 \times 10^{-3} \pm 4.27 \times 10^{-6}$ |
| Stria terminalis R                   | PNG (DTI-TK) | -3393.78 | 4.121     | <0.001 | $0.79 \times 10^{-3} \pm 4.29 \times 10^{-6}$ |



**Supplementary Table S7** Summary of linear mixed-effect regression analyses of the longitudinal RD changes during a single season. L/R: Left/right hemisphere.

| ROI                            | Template     | AIC      | Timepoint |          | RD (mean $\pm$ SE)                            |
|--------------------------------|--------------|----------|-----------|----------|-----------------------------------------------|
|                                |              |          | <i>t</i>  | <i>p</i> |                                               |
| Corona radiata - anterior L    | FMRIB58      | -3428.68 | 3.485     | 0.001    | $0.50 \times 10^{-3} \pm 5.15 \times 10^{-6}$ |
| Corona radiata - anterior L    | IITv3.0      | -3425.70 | 3.424     | 0.001    | $0.50 \times 10^{-3} \pm 5.04 \times 10^{-6}$ |
| Corona radiata - anterior L    | PNG (ANTs)   | -3423.19 | 3.378     | 0.001    | $0.50 \times 10^{-3} \pm 5.17 \times 10^{-6}$ |
| Corona radiata - anterior L    | PNG (DTI-TK) | -3445.18 | 3.519     | 0.001    | $0.50 \times 10^{-3} \pm 4.63 \times 10^{-6}$ |
| Corona radiata - posterior L   | FMRIB58      | -3504.33 | 3.278     | 0.001    | $0.57 \times 10^{-3} \pm 5.20 \times 10^{-6}$ |
| Corona radiata - posterior L   | IITv3.0      | -3534.10 | 3.353     | 0.001    | $0.58 \times 10^{-3} \pm 4.78 \times 10^{-6}$ |
| Corona radiata - posterior L   | PNG (ANTs)   | -3524.54 | 2.962     | 0.004    | $0.57 \times 10^{-3} \pm 4.82 \times 10^{-6}$ |
| Corona radiata - posterior L   | PNG (DTI-TK) | -3521.96 | 3.226     | 0.002    | $0.56 \times 10^{-3} \pm 4.73 \times 10^{-6}$ |
| Corona radiata - posterior R   | FMRIB58      | -3458.14 | 3.595     | <0.001   | $0.52 \times 10^{-3} \pm 5.15 \times 10^{-6}$ |
| Corona radiata - posterior R   | IITv3.0      | -3491.90 | 3.634     | <0.001   | $0.52 \times 10^{-3} \pm 4.62 \times 10^{-6}$ |
| Corona radiata - posterior R   | PNG (ANTs)   | -3478.75 | 3.543     | 0.001    | $0.52 \times 10^{-3} \pm 4.91 \times 10^{-6}$ |
| Corona radiata - posterior R   | PNG (DTI-TK) | -3478.70 | 3.678     | <0.001   | $0.52 \times 10^{-3} \pm 5.02 \times 10^{-6}$ |
| Corona radiata - superior L    | FMRIB58      | -3541.79 | 3.433     | 0.001    | $0.51 \times 10^{-3} \pm 4.19 \times 10^{-6}$ |
| Corona radiata - superior L    | IITv3.0      | -3557.26 | 3.209     | 0.002    | $0.51 \times 10^{-3} \pm 3.73 \times 10^{-6}$ |
| Corona radiata - superior L    | PNG (ANTs)   | -3527.16 | 3.132     | 0.002    | $0.50 \times 10^{-3} \pm 4.28 \times 10^{-6}$ |
| Corona radiata - superior L    | PNG (DTI-TK) | -3573.73 | 3.386     | 0.001    | $0.52 \times 10^{-3} \pm 3.66 \times 10^{-6}$ |
| Corona radiata - superior R    | FMRIB58      | -3530.15 | 3.637     | <0.001   | $0.49 \times 10^{-3} \pm 3.53 \times 10^{-6}$ |
| Corona radiata - superior R    | IITv3.0      | -3525.04 | 3.624     | <0.001   | $0.50 \times 10^{-3} \pm 3.49 \times 10^{-6}$ |
| Corona radiata - superior R    | PNG (ANTs)   | -3520.92 | 3.709     | <0.001   | $0.50 \times 10^{-3} \pm 3.53 \times 10^{-6}$ |
| Corona radiata - superior R    | PNG (DTI-TK) | -3510.80 | 3.691     | <0.001   | $0.50 \times 10^{-3} \pm 3.55 \times 10^{-6}$ |
| Cingulum R                     | FMRIB58      | -3418.20 | 3.696     | <0.001   | $0.47 \times 10^{-3} \pm 4.67 \times 10^{-6}$ |
| Cingulum R                     | IITv3.0      | -3449.84 | 4.119     | <0.001   | $0.45 \times 10^{-3} \pm 4.00 \times 10^{-6}$ |
| Cingulum R                     | PNG (ANTs)   | -3409.71 | 3.802     | <0.001   | $0.46 \times 10^{-3} \pm 4.82 \times 10^{-6}$ |
| Cingulum R                     | PNG (DTI-TK) | -3076.68 | 2.334     | 0.021    | $0.52 \times 10^{-3} \pm 1.16 \times 10^{-5}$ |
| External capsule R             | FMRIB58      | -3441.82 | 3.673     | <0.001   | $0.58 \times 10^{-3} \pm 3.84 \times 10^{-6}$ |
| External capsule R             | IITv3.0      | -3430.02 | 3.626     | <0.001   | $0.59 \times 10^{-3} \pm 3.91 \times 10^{-6}$ |
| External capsule R             | PNG (ANTs)   | -3435.03 | 3.640     | <0.001   | $0.59 \times 10^{-3} \pm 3.83 \times 10^{-6}$ |
| External capsule R             | PNG (DTI-TK) | -3438.87 | 3.679     | <0.001   | $0.59 \times 10^{-3} \pm 3.80 \times 10^{-6}$ |
| Internal capsule - posterior R | FMRIB58      | -3523.57 | 3.928     | <0.001   | $0.35 \times 10^{-3} \pm 3.54 \times 10^{-6}$ |
| Internal capsule - posterior R | IITv3.0      | -3505.42 | 3.850     | <0.001   | $0.34 \times 10^{-3} \pm 3.71 \times 10^{-6}$ |
| Internal capsule - posterior R | PNG (ANTs)   | -3492.87 | 3.860     | <0.001   | $0.33 \times 10^{-3} \pm 3.94 \times 10^{-6}$ |
| Internal capsule - posterior R | PNG (DTI-TK) | -3490.18 | 3.804     | <0.001   | $0.33 \times 10^{-3} \pm 3.94 \times 10^{-6}$ |

(cont.)

| ROI                                  | Template     | AIC      | Timepoint |          | RD (mean $\pm$ SE)                            |
|--------------------------------------|--------------|----------|-----------|----------|-----------------------------------------------|
|                                      |              |          | <i>t</i>  | <i>p</i> |                                               |
| Internal capsule - retrolenticular R | FMRIB58      | -3448.23 | 3.659     | <0.001   | $0.47 \times 10^{-3} \pm 4.43 \times 10^{-6}$ |
| Internal capsule - retrolenticular R | IITv3.0      | -3444.53 | 3.594     | <0.001   | $0.48 \times 10^{-3} \pm 4.42 \times 10^{-6}$ |
| Internal capsule - retrolenticular R | PNG (ANTs)   | -3454.16 | 3.501     | 0.001    | $0.48 \times 10^{-3} \pm 4.21 \times 10^{-6}$ |
| Internal capsule - retrolenticular R | PNG (DTI-TK) | -3439.08 | 3.285     | 0.001    | $0.48 \times 10^{-3} \pm 4.34 \times 10^{-6}$ |
| Superior longitudinal fasciculus L   | FMRIB58      | -3546.15 | 3.125     | 0.002    | $0.51 \times 10^{-3} \pm 3.93 \times 10^{-6}$ |
| Superior longitudinal fasciculus L   | IITv3.0      | -3506.09 | 3.064     | 0.003    | $0.51 \times 10^{-3} \pm 4.18 \times 10^{-6}$ |
| Superior longitudinal fasciculus L   | PNG (ANTs)   | -3535.54 | 2.973     | 0.004    | $0.51 \times 10^{-3} \pm 4.22 \times 10^{-6}$ |
| Superior longitudinal fasciculus L   | PNG (DTI-TK) | -3561.37 | 3.435     | 0.001    | $0.53 \times 10^{-3} \pm 3.86 \times 10^{-6}$ |
